# Supplementary material for: A Genome-Scale Vector Resource Enables High-Throughput Reverse Genetic Screening in a Malaria Parasite
Source: PubMed Central journal article supplement (PMC4362957; doi:10.1016/j.chom.2015.01.014), 2015-03-11
Supplement: mmc1.pdf [file mmc1.pdf]

Cell Host & Microbe, 17

## **Supplemental Information**

### **A Genome Scale Vector Resource Enables High-Throughput Reverse Genetic Screening in a Malaria Parasite**

Ana Rita Gomes, Ellen Bushell, Frank Schwach, Gareth Girling, Burcu Anar,  
Michael A. Quail, Colin Herd, Claudia Pfander, Katarzyna Modrzynska,  
Julian C. Rayner, and Oliver Billker

**Table S1. Targetability and fitness measurements for 40 eukaryotic protein kinase genes as determined by barcode sequencing, compared to data from a previous study by Tewari *et al.* (2010), which used conventional gene targeting. p values are adjusted for multiple testing. The table combines data from 5 different barseq screens. n = 6 for most fitness measurements, except for PBANKA\_082960 (n = 3), *gsk3*, *kin* and PBANKA\_082710 (n = 4). p. t. = post transfection. Related to Figs. 3 and 5.**

| <i>P. berghei</i> gene ID | Gene name            | Tewari <i>et al.</i> 2010 | This study         | Day 5 p. t. |      |         | Day 6 p. t. |      |         | Day 7 p. t. |      |         | Day 8 p. t. |      |         | Average fitness, days 5-8 | Assessment              |
|---------------------------|----------------------|---------------------------|--------------------|-------------|------|---------|-------------|------|---------|-------------|------|---------|-------------|------|---------|---------------------------|-------------------------|
|                           |                      |                           |                    | Fitness     | SD   | p       | Fitness     | SD   | p       | Fitness     | SD   | p       | Fitness     | SD   | p       |                           |                         |
| PBANKA_135150             | <i>cdpk5</i>         | Possibly essential        | Possibly essential | NA          | NA   | NA      | NA          | NA   | NA      | NA          | NA   | NA      | NA          | NA   | NA      | NA                        | Possibly essential      |
| PBANKA_092520             | <i>cdpk7</i>         | Possibly essential        | Possibly essential | NA          | NA   | NA      | NA          | NA   | NA      | NA          | NA   | NA      | NA          | NA   | NA      | NA                        | Possibly essential      |
| PBANKA_031140             |                      | Possibly essential        | Possibly essential | NA          | NA   | NA      | NA          | NA   | NA      | NA          | NA   | NA      | NA          | NA   | NA      | NA                        | Possibly essential      |
| PBANKA_083560             | <i>pka</i>           | Possibly essential        | Possibly essential | NA          | NA   | NA      | NA          | NA   | NA      | NA          | NA   | NA      | NA          | NA   | NA      | NA                        | Possibly essential      |
| PBANKA_090380             |                      | Possibly essential        | Possibly essential | NA          | NA   | NA      | NA          | NA   | NA      | NA          | NA   | NA      | NA          | NA   | NA      | NA                        | Possibly essential      |
| PBANKA_091210             | <i>ck1</i>           | Possibly essential        | Possibly essential | NA          | NA   | NA      | NA          | NA   | NA      | NA          | NA   | NA      | NA          | NA   | NA      | NA                        | Possibly essential      |
| PBANKA_071730             | <i>crk-3</i>         | Possibly essential        | Possibly essential | NA          | NA   | NA      | NA          | NA   | NA      | NA          | NA   | NA      | NA          | NA   | NA      | NA                        | Possibly essential      |
| PBANKA_130920             | <i>lammer/(CLK1)</i> | Possibly essential        | Possibly essential | NA          | NA   | NA      | NA          | NA   | NA      | NA          | NA   | NA      | NA          | NA   | NA      | NA                        | Possibly essential      |
| PBANKA_093300             | <i>prk4</i>          | Possibly essential        | Possibly essential | NA          | NA   | NA      | NA          | NA   | NA      | NA          | NA   | NA      | NA          | NA   | NA      | NA                        | Possibly essential      |
| PBANKA_080800             | <i>crk-4</i>         | Possibly essential        | Possibly essential | NA          | NA   | NA      | NA          | NA   | NA      | NA          | NA   | NA      | NA          | NA   | NA      | NA                        | Possibly essential      |
| PBANKA_090110             |                      | Possibly essential        | Possibly essential | NA          | NA   | NA      | NA          | NA   | NA      | NA          | NA   | NA      | NA          | NA   | NA      | NA                        | Possibly essential      |
| PBANKA_093860             | <i>ck2</i>           | Possibly essential        | Possibly essential | NA          | NA   | NA      | NA          | NA   | NA      | NA          | NA   | NA      | NA          | NA   | NA      | NA                        | Possibly essential      |
| PBANKA_101090             | <i>tkl5</i>          | Possibly essential        | Possibly essential | NA          | NA   | NA      | NA          | NA   | NA      | NA          | NA   | NA      | NA          | NA   | NA      | NA                        | Possibly essential      |
| PBANKA_144300             | <i>nek-1</i>         | Possibly essential        | Possibly essential | NA          | NA   | NA      | NA          | NA   | NA      | NA          | NA   | NA      | NA          | NA   | NA      | NA                        | Possibly essential      |
| PBANKA_135090             | <i>pk6</i>           | Possibly essential        | Possibly essential | NA          | NA   | NA      | NA          | NA   | NA      | NA          | NA   | NA      | NA          | NA   | NA      | NA                        | Possibly essential      |
| PBANKA_080560             |                      | Possibly essential        | Possibly essential | NA          | NA   | NA      | NA          | NA   | NA      | NA          | NA   | NA      | NA          | NA   | NA      | NA                        | Possibly essential      |
| PBANKA_122500             | <i>fikk</i>          | Possibly essential        | Possibly essential | NA          | NA   | NA      | NA          | NA   | NA      | NA          | NA   | NA      | NA          | NA   | NA      | NA                        | Possibly essential      |
| PBANKA_100820             | <i>pkq</i>           | Possibly essential        | Possibly essential | NA          | NA   | NA      | NA          | NA   | NA      | NA          | NA   | NA      | NA          | NA   | NA      | NA                        | Possibly essential      |
| PBANKA_112690             | <i>pk4</i>           | Possibly essential        | Possibly essential | NA          | NA   | NA      | NA          | NA   | NA      | NA          | NA   | NA      | NA          | NA   | NA      | NA                        | Possibly essential      |
| PBANKA_052140             | <i>rio2</i>          | Possibly essential        | Possibly essential | NA          | NA   | NA      | NA          | NA   | NA      | NA          | NA   | NA      | NA          | NA   | NA      | NA                        | Possibly essential†□    |
| PBANKA_040110             | <i>srpk</i>          | KO confirmed              | Targetable         | 0.59        | 0.18 | 2.5E-02 | 0.65        | 0.24 | 1.3E-01 | 0.80        | 0.08 | 7.8E-02 | 0.83        | 0.15 | 2.1E-01 | 0.72                      | Confirmed KO            |
| PBANKA_040820             | <i>cdpk3</i>         | KO confirmed              | Targetable         | 1.00        | 0.09 | 1.0E+00 | 0.97        | 0.05 | 2.2E-01 | 1.01        | 0.07 | 7.6E-01 | 1.04        | 0.06 | 2.9E-01 | 1.01                      | Confirmed KO            |
| PBANKA_040940             | <i>pkrp</i>          | KO confirmed              | Targetable         | 0.98        | 0.21 | 9.2E-01 | 1.03        | 0.09 | 7.4E-01 | 0.98        | 0.09 | 9.0E-01 | 1.02        | 0.05 | 8.5E-01 | 1.00                      | Confirmed KO            |
| PBANKA_061520             | <i>cdpk4</i>         | KO confirmed              | Targetable         | 0.94        | 0.13 | 5.8E-01 | 0.89        | 0.10 | 4.1E-02 | 0.98        | 0.07 | 7.4E-01 | 0.81        | 0.08 | 1.4E-02 | 0.90                      | Confirmed KO            |
| PBANKA_061670             | <i>nek-4</i>         | KO confirmed              | Targetable         | 0.87        | 0.19 | 2.0E-01 | 1.00        | 0.16 | 9.7E-01 | 1.02        | 0.11 | 7.4E-01 | 1.02        | 0.16 | 8.5E-01 | 0.98                      | Confirmed KO            |
| PBANKA_082710             |                      | KO confirmed              | Targetable         | 0.38        | 0.22 | 2.5E-03 | 0.65        | 0.06 | 1.7E-04 | 0.91        | 0.08 | 2.9E-02 | 1.03        | 0.38 | 8.4E-01 | 0.74                      | Confirmed KO            |
| PBANKA_092550             | <i>cdpk6</i>         | KO confirmed              | Targetable         | 0.86        | 0.12 | 8.9E-02 | 0.90        | 0.05 | 8.7E-03 | 0.79        | 0.10 | 8.1E-03 | 0.97        | 0.12 | 6.8E-01 | 0.88                      | Confirmed KO            |
| PBANKA_093370             | <i>map-2</i>         | KO confirmed              | Targetable         | 0.99        | 0.11 | 9.5E-01 | 0.95        | 0.06 | 1.8E-01 | 1.05        | 0.06 | 2.1E-01 | 1.03        | 0.05 | 4.2E-01 | 1.00                      | Confirmed KO            |
| PBANKA_101330             | <i>map-1</i>         | KO confirmed              | Targetable         | 1.04        | 0.11 | 5.8E-01 | 0.92        | 0.04 | 4.1E-03 | 1.06        | 0.04 | 4.1E-02 | 1.04        | 0.04 | 8.5E-02 | 1.02                      | Confirmed KO            |
| PBANKA_101980             | <i>cdlk</i>          | KO confirmed              | Targetable         | 0.20        | 0.02 | 5.0E-06 | 0.53        | 0.13 | 1.7E-02 | 0.62        | 0.42 | 4.2E-01 | 1.13        | 0.19 | 8.0E-01 | 0.62                      | Confirmed KO            |
| PBANKA_112270             | <i>tkl4</i>          | KO confirmed              | Targetable         | 0.46        | 0.33 | 7.8E-02 | 0.28        | 0.11 | 2.9E-03 | 0.55        | 0.16 | 3.0E-02 | 0.69        | 0.11 | 6.2E-02 | 0.49                      | Confirmed KO            |
| PBANKA_130690             | <i>srpk2</i>         | KO confirmed              | Targetable         | 0.83        | 0.32 | 5.3E-01 | 1.00        | 0.09 | 9.7E-01 | 1.01        | 0.14 | 9.5E-01 | 1.05        | 0.09 | 3.9E-01 | 0.97                      | Confirmed KO            |
| PBANKA_131800             | <i>kin</i>           | KO confirmed              | Targetable         | 1.08        | 0.29 | 6.9E-01 | 0.99        | 0.10 | 1.9E-01 | 0.97        | 0.07 | 2.0E-01 | 1.00        | 0.11 | 8.4E-01 | 1.01                      | Confirmed KO            |
| PBANKA_135260             |                      | KO confirmed              | Targetable         | 0.88        | 0.27 | 5.8E-01 | 0.98        | 0.07 | 5.6E-01 | 1.00        | 0.09 | 9.5E-01 | 1.03        | 0.04 | 3.9E-01 | 0.97                      | Confirmed KO            |
| PBANKA_146050             | <i>gak</i>           | KO confirmed              | Targetable         | 0.83        | 0.12 | 8.9E-02 | 0.74        | 0.09 | 2.6E-03 | 0.83        | 0.05 | 1.4E-04 | 1.17        | 0.11 | 8.5E-02 | 0.89                      | Confirmed KO            |
| PBANKA_030850             | <i>tkl1</i>          | Possibly essential        | Targetable         | 0.86        | 0.28 | 5.3E-01 | 0.96        | 0.21 | 8.4E-01 | 1.14        | 0.18 | 1.7E-01 | 1.04        | 0.06 | 3.9E-01 | 1.00                      | New KO                  |
| PBANKA_031420             | <i>cdpk1</i>         | Possibly essential        | Targetable §       | 0.95        | 0.14 | 5.5E-01 | 0.89        | 0.05 | 1.4E-03 | 1.10        | 0.05 | 2.7E-03 | 1.00        | 0.06 | 9.5E-01 | 0.98                      | New KO Ω                |
| PBANKA_041040             | <i>gsk-3</i>         | Possibly essential        | Targetable         | 0.99        | 0.03 | 8.2E-01 | 1.00        | 0.04 | 9.3E-01 | 1.05        | 0.05 | 5.6E-01 | 1.01        | 0.03 | 8.5E-01 | 1.01                      | New KO Ω                |
| PBANKA_082960             |                      | Possibly essential        | Targetable         | 1.03        | 0.04 | 7.5E-01 | 1.02        | 0.08 | 7.5E-01 | 1.01        | 0.06 | 7.5E-01 | 1.05        | 0.02 | 2.5E-02 | 1.03                      | New KO Ω                |
| PBANKA_130520             |                      | Possibly essential        | Targetable         | 1.02        | 0.12 | 9.5E-01 | 0.98        | 0.13 | 8.4E-01 | 1.01        | 0.10 | 8.3E-01 | 0.99        | 0.08 | 9.5E-01 | 1.00                      | New KO *                |
| PBANKA_136210             | <i>tkl3</i>          | Possibly essential        | Targetable         | 1.05        | 0.22 | 7.7E-01 | 0.99        | 0.09 | 9.6E-01 | 1.06        | 0.14 | 4.6E-01 | 0.92        | 0.09 | 2.0E-01 | 1.01                      | New KO Ω                |
| PBANKA_141450             |                      | Possibly essential        | Targetable         | 0.91        | 0.33 | 7.3E-01 | 1.00        | 0.16 | 9.7E-01 | 0.94        | 0.07 | 1.7E-01 | 0.99        | 0.10 | 8.5E-01 | 0.96                      | New KO *                |
| PBANKA_142160             |                      | Possibly essential        | Targetable         | 1.01        | 0.13 | 1.0E+00 | 0.93        | 0.07 | 3.4E-02 | 1.10        | 0.16 | 2.4E-01 | 1.01        | 0.12 | 9.5E-01 | 1.01                      | New KO *                |
| PBANKA_144560             | <i>rio1</i>          | Possibly essential        | Targetable         | 0.23        | 0.00 | 2.0E-03 | 0.67        | 0.04 | 1.1E-02 | 0.91        | 0.08 | 2.7E-01 | 0.94        | 0.01 | 5.9E-02 | 0.69                      | New KO †                |
| PBANKA_020580             | <i>eik2; uis1</i>    | KO confirmed              | No integration     | NA          | NA   | NA      | NA          | NA   | NA      | NA          | NA   | NA      | NA          | NA   | NA      | NA                        | False negative          |
| PBANKA_031030             | <i>pk7</i>           | KO confirmed              | No integration     | NA          | NA   | NA      | NA          | NA   | NA      | NA          | NA   | NA      | NA          | NA   | NA      | NA                        | False negative          |
| PBANKA_051490             | <i>p28</i>           |                           | Targetable         | 0.92        | 0.15 | 5.3E-01 | 0.98        | 0.10 | 9.2E-01 | 0.98        | 0.05 | 7.4E-01 | 1.01        | 0.06 | 8.5E-01 | 0.97                      | Normal growth reference |
| PBANKA_051500             | <i>p25</i>           |                           | Targetable         | 1.01        | 0.12 | 9.8E-01 | 1.03        | 0.02 | 1.0E-01 | 1.04        | 0.07 | 2.4E-01 | 0.98        | 0.04 | 3.9E-01 | 1.02                      | Normal growth reference |
| PBANKA_103780             | <i>soap</i>          |                           | Targetable         | 1.00        | 0.08 | 1.0E+00 | 0.95        | 0.07 | 1.1E-01 | 1.06        | 0.05 | 1.1E-01 | 1.03        | 0.05 | 3.8E-01 | 1.01                      | Normal growth reference |
| PBANKA_030600             | <i>p230p</i>         |                           | Taggable           | 1.07        | 0.12 | 5.8E-01 | 1.04        | 0.07 | 4.7E-01 | 0.91        | 0.03 | 8.1E-03 | 0.98        | 0.09 | 8.5E-01 | 1.00                      | Normal growth reference |
| PBANKA_140160             |                      |                           | Targetable         | 0.51        | 0.12 | 1.1E-04 | 0.46        | 0.06 | 1.3E-05 | 0.58        | 0.07 | 2.1E-05 | 0.87        | 0.07 | 1.4E-02 | 0.60                      | Attenuated reference    |
| PBANKA_110420             | <i>bckdh e1b</i>     |                           | Targetable         | 0.74        | 0.12 | 6.9E-03 | 0.58        | 0.07 | 1.3E-05 | 0.67        | 0.05 | 2.8E-06 | 0.61        | 0.06 | 6.6E-05 | 0.65                      | Attenuated reference    |
| PBANKA_103440             | <i>pm4</i>           |                           | Targetable         | 0.79        | 0.20 | 8.9E-02 | 0.73        | 0.05 | 1.3E-05 | 0.71        | 0.12 | 4.3E-03 | 0.70        | 0.08 | 2.2E-03 | 0.73                      | Attenuated reference    |

\* PCR genotyping evidence for targetability but no independent clone generated.

§ This study and Jebiwott *et al.*, 2013

† Confirmed by WGS of uncloned population

□ Confirmed by selection for target duplication

Ω Confirmed by genotyped clone

◊ Confirmed by PFGE analysis of uncloned population

**Table S2. Gene identification numbers (ID), *Plasmo*GEM vector IDs and gene specific genotyping primers. Related to Figs. 3-4 and Fig. S1.**

| Gene ID       | <i>Plasmo</i> GEM ID | Gene name                                                   | Gene specific primer | Sequence                | Pairs with |
|---------------|----------------------|-------------------------------------------------------------|----------------------|-------------------------|------------|
| p230p-tag     | PbGEM-226060         | p230p-tag                                                   | arg00448             | GGAACAATATGGCTGTTCAATC  | arg00218   |
| PBANKA_051490 | PbGEM-015545         | 28 kDa ookinete surface protein (P28)                       | arg00447             | GGATTCGGTGAATGATCCCC    | arg00216   |
| PBANKA_051500 | PbGEM-015561         | 25 kDa ookinete surface antigen precursor (P25)             | arg00449             | TGTTCCCGTTGTAACAGTGCA   | arg00216   |
| PBANKA_103780 | PbGEM-097822         | secreted ookinete adhesive protein (SOAP)                   | arg00446             | TTTCCCACTGCGTACCCTTT    | arg00218   |
| PBANKA_103440 | PbGEM-039254         | plasmepsin IV (PM4)                                         | arg00452             | AGACAAACTTTGCCACAACA    | arg00216   |
| PBANKA_110420 | PbGEM-122074         | 3-methyl-2-oxobutanoate dehydrogenase (lipoamide), putative | arg00451             | AAAGCCAGAAACGACATGAA    | arg00218   |
| PBANKA_140160 | PbGEM-062476         | methyl transferase-like protein, putative                   | arg00450             | CATGGCTATGACCCGACAGAG   | arg00218   |
| PBANKA_020580 | PbGEM-082161         | serine/threonine protein kinase, putative (IK2)             | arg00471             | CGAAGCGCTTTACCATGTGGG   | arg00218   |
| PBANKA_030850 | PbGEM-009884         | protein kinase, putative (TKL1)                             | arg00472             | AGTGCAATACGCTTATGACGCT  | arg00216   |
| PBANKA_031030 | PbGEM-072470         | protein kinase 7 (PK7)                                      | arg00473             | AACCGAAGTGCTCTTTGCCA    | arg00216   |
| PBANKA_031140 | PbGEM-111762         | serine/threonine protein kinase, putative                   | arg00474             | TGCTACCTACGCATTGGACA    | arg00218   |
| PBANKA_031420 | PbGEM-010677         | calcium dependent protein kinase 1 (CDPK1)                  | arg00371             | CCGGTATTATATCAAGAG      | arg00216   |
| PBANKA_040110 | PbGEM-084034         | serine/threonine protein kinase, putative (SRPK1)           | arg00475             | TGATCGGATTTGTGTGTGT     | arg00218   |
| PBANKA_040820 | PbGEM-111826         | calcium dependent protein kinase 3 (CDPK3)                  | arg00386             | GGTTATCTATACATTTATTGTG  | arg00218   |
| PBANKA_040940 | PbGEM-111754         | protein kinase, putative (PKRP)                             | arg00476             | AGCAATGATGTAGGATGTGCA   | arg00216   |
| PBANKA_052140 | PbGEM-072474         | RIO-like serine/threonine kinase, putative                  | arg00477             | TCCAAAGCGTTATGCCAAGTG   | arg00218   |
| PBANKA_061520 | PbGEM-087803         | calcium dependent protein kinase 4 (CDPK4)                  | arg00255             | GGGGGTTTGTGTGGAGGCG     | arg00216   |
| PBANKA_061670 | PbGEM-111690         | NIMA related kinase 4 (NEK4)                                | arg00234             | GCACACTCACCTGAAATGTCG   | arg00216   |
| PBANKA_071730 | PbGEM-072538         | cdc2-related protein kinase 3 (CRK3)                        | arg00478             | TGGTTCAATTGTTGAGCAAAG   | arg00218   |
| PBANKA_080560 | PbGEM-072522         | O-sialoglycoprotein endopeptidase, putative                 | arg00479             | TCGAAAAACCTTGAAGCGC     | arg00218   |
| PBANKA_080800 | PbGEM-111786         | cdc2-related protein kinase 4 (CRK4)                        | arg00480             | TCGTAGTTATATATGCTCACGC  | arg00216   |
| PBANKA_083560 | PbGEM-028140         | cAMP-dependent protein kinase catalytic subunit (PKAc)      | arg00482             | TCAAGTGAACGGAATAGAAG    | arg00218   |
| PBANKA_090110 | PbGEM-111746         | protein kinase, putative                                    | arg00483             | TCAGAAAGGTATACGTC AACG  | arg00216   |
| PBANKA_090380 | PbGEM-111794         | serine/threonine protein kinase, putative                   | arg00484             | AGCTTGTATGTCGATTCGAGA   | arg00218   |
| PBANKA_091210 | PbGEM-111738         | casein kinase 1 (CK1)                                       | arg00485             | ACGATGTGTGCAGCAGGTCT    | arg00216   |
| PBANKA_092520 | PbGEM-093973         | calcium-dependent protein kinase 7 (CDPK7)                  | arg00486             | TGTCTCCCTAAAAGGCATGTGC  | arg00218   |
| PBANKA_092550 | PbGEM-111850         | calcium dependent protein kinase 6 (CDPK6)                  | arg00381             | TGCACTTCAACAAAAGCGCCA   | arg00218   |
| PBANKA_093300 | PbGEM-072518         | serine/threonine protein kinase, putative                   | arg00487             | AGCAGTGCACACAAAAGAAG    | arg00218   |
| PBANKA_093370 | PbGEM-111778         | mitogen-activated protein kinase 2 (MAP2)                   | arg00256             | ACCATGATGCATGCATAGGA    | arg00216   |
| PBANKA_101330 | PbGEM-036210         | mitogen-activated protein kinase 1 (MAP1)                   | arg00453             | CGCGTGGAAAACGTGGGC      | arg00216   |
| PBANKA_101980 | PbGEM-111858         | serine/threonine protein kinase, putative                   | arg00488             | TGCCCGGAATGCACATATGTTG  | arg00216   |
| PBANKA_112270 | PbGEM-111714         | protein kinase, putative (TKL4)                             | arg00489             | TGGGGAGTACTTGGCCATGCT   | arg00216   |
| PBANKA_112690 | PbGEM-099789         | protein kinase PK4 (PK4)                                    | arg00490             | AGTATTGCCCATCCATTGCT    | arg00218   |
| PBANKA_122500 | PbGEM-111674         | serine/threonine protein kinase, FIKK family                | arg00491             | TGTCTGACTCTCCATGGTGTCC  | arg00218   |
| PBANKA_130520 | PbGEM-053796         | serine/threonine protein kinase, putative                   | arg00456             | GAGTACCTGTTGGTCACGC     | arg00216   |
| PBANKA_130690 | PbGEM-104812         | serine/threonine protein kinase, putative (SRPK2)           | arg00225             | TGCCCTTTTGATGCCAAGACG   | arg00216   |
| PBANKA_130920 | PbGEM-104970         | serine/threonine kinase-1, putative                         | arg00492             | TCACGCATCGGGGATTTGTCA   | arg00216   |
| PBANKA_131800 | PbGEM-105530         | serine/threonine protein kinase, putative                   | arg00493             | ACGGAGCACAAATGTATGCCATC | arg00218   |
| PBANKA_135150 | PbGEM-111682         | calcium dependent protein kinase 5 (CDPK5)                  | arg00494             | TCGACGGTACTGTCTGACTGG   | arg00216   |
| PBANKA_135260 | PbGEM-111802         | serine/threonine protein kinase, putative                   | arg00259             | CTGGCGCACGGCAAACCC      | arg00218   |
| PBANKA_136210 | PbGEM-108848         | protein kinase, putative                                    | arg00262             | ACGACAATGTGCATGCCTCA    | arg00218   |
| PBANKA_141450 | PbGEM-111842         | protein kinase, putative                                    | arg00272             | CCACAAAGCAATTCGGGTGC    | arg00218   |
| PBANKA_142160 | PbGEM-065291         | calcium/calmodulin-dependent protein kinase, putative       | arg00454             | TCTAAATCGCGGCTTTCACA    | arg00218   |
| PBANKA_144560 | PbGEM-111706         | protein kinase, putative                                    | arg00495             | TGCTCAAGCAACAGCAGGACA   | arg00216   |
| PBANKA_146050 | PbGEM-072542         | serine/threonine protein kinase, putative                   | arg00173             | CCTGGAATTGTTCCCAACAC    | arg00218   |

**Table S3. Oligonucleotide used for barcode sequencing. Related to Fig. 3 and S1.**

| Name        | Sequence                                                                        |
|-------------|---------------------------------------------------------------------------------|
| arg00444    | TCGGCATTCTGCTGAACCGCTCTTCCGATCTGTAATTCGTGCGCGTCAG                               |
| arg00445    | ACACTCTTCCCTACACGACGCTCTTCCGATCTCCTTCAATTCGATGGGTAC                             |
| PE1.0       | AATGATACGGCGACCACCGAGATCTACACTCTTCCCTACACGACGCTCTTCCGATC*1)                     |
| iPCRindex1  | CAAGCAGAAGACGGCATAACGAGATTGCTAATCACTGAGATCGGTCTCGGCATTCTGCTGAACCGCTCTTCCGATC*T  |
| iPCRindex2  | CAAGCAGAAGACGGCATAACGAGATTAGGGGGATTTCGAGATCGGTCTCGGCATTCTGCTGAACCGCTCTTCCGATC*T |
| iPCRindex3  | CAAGCAGAAGACGGCATAACGAGATAGTTTCCCAGGGAGATCGGTCTCGGCATTCTGCTGAACCGCTCTTCCGATC*T  |
| iPCRindex4  | CAAGCAGAAGACGGCATAACGAGATCCTGGGAGGTAGAGATCGGTCTCGGCATTCTGCTGAACCGCTCTTCCGATC*T  |
| iPCRindex5  | CAAGCAGAAGACGGCATAACGAGATATAACCACAAATGAGATCGGTCTCGGCATTCTGCTGAACCGCTCTTCCGATC*T |
| iPCRindex6  | CAAGCAGAAGACGGCATAACGAGATGATCTCTCGGGGAGATCGGTCTCGGCATTCTGCTGAACCGCTCTTCCGATC*T  |
| iPCRindex7  | CAAGCAGAAGACGGCATAACGAGATACCCTATACTCGAGATCGGTCTCGGCATTCTGCTGAACCGCTCTTCCGATC*T  |
| iPCRindex8  | CAAGCAGAAGACGGCATAACGAGATCTCAATTAAGAGAGATCGGTCTCGGCATTCTGCTGAACCGCTCTTCCGATC*T  |
| iPCRindex9  | CAAGCAGAAGACGGCATAACGAGATCGACAGAACGTGAGATCGGTCTCGGCATTCTGCTGAACCGCTCTTCCGATC*T  |
| iPCRindex10 | CAAGCAGAAGACGGCATAACGAGATTCGCCATTATGGAGATCGGTCTCGGCATTCTGCTGAACCGCTCTTCCGATC*T  |
| iPCRindex11 | CAAGCAGAAGACGGCATAACGAGATATGTTCCGGCCGAGATCGGTCTCGGCATTCTGCTGAACCGCTCTTCCGATC*T  |
| iPCRindex12 | CAAGCAGAAGACGGCATAACGAGATTTCTGAAGTGAGAGATCGGTCTCGGCATTCTGCTGAACCGCTCTTCCGATC*T  |
| iPCRindex13 | CAAGCAGAAGACGGCATAACGAGATGAAGGCCAGCTGAGATCGGTCTCGGCATTCTGCTGAACCGCTCTTCCGATC*T  |
| iPCRindex14 | CAAGCAGAAGACGGCATAACGAGATCCAATGTGCAGGAGATCGGTCTCGGCATTCTGCTGAACCGCTCTTCCGATC*T  |
| iPCRindex15 | CAAGCAGAAGACGGCATAACGAGATATCGAAGGACCGAGATCGGTCTCGGCATTCTGCTGAACCGCTCTTCCGATC*T  |
| iPCRindex16 | CAAGCAGAAGACGGCATAACGAGATTCGGGTGCGAAGAGATCGGTCTCGGCATTCTGCTGAACCGCTCTTCCGATC*T  |
| iPCRindex17 | CAAGCAGAAGACGGCATAACGAGATGTAATTTACGGGAGATCGGTCTCGGCATTCTGCTGAACCGCTCTTCCGATC*T  |
| iPCRindex18 | CAAGCAGAAGACGGCATAACGAGATATATCGACTACGAGATCGGTCTCGGCATTCTGCTGAACCGCTCTTCCGATC*T  |
| iPCRindex19 | CAAGCAGAAGACGGCATAACGAGATTGATTCTTACAGAGATCGGTCTCGGCATTCTGCTGAACCGCTCTTCCGATC*T  |
| iPCRindex20 | CAAGCAGAAGACGGCATAACGAGATACGGCGGGCTGAGATCGGTCTCGGCATTCTGCTGAACCGCTCTTCCGATC*T   |
| iPCRindex21 | CAAGCAGAAGACGGCATAACGAGATCTTGCGTGGAGGAGATCGGTCTCGGCATTCTGCTGAACCGCTCTTCCGATC*T  |
| iPCRindex22 | CAAGCAGAAGACGGCATAACGAGATTAATCAAAGACGAGATCGGTCTCGGCATTCTGCTGAACCGCTCTTCCGATC*T  |
| iPCRindex23 | CAAGCAGAAGACGGCATAACGAGATGGCGGGCTCTAGAGATCGGTCTCGGCATTCTGCTGAACCGCTCTTCCGATC*T  |
| iPCRindex24 | CAAGCAGAAGACGGCATAACGAGATCCTCCATTTCTGAGATCGGTCTCGGCATTCTGCTGAACCGCTCTTCCGATC*T  |
| iPCRindex25 | CAAGCAGAAGACGGCATAACGAGATAACCAGCGCTGGAGATCGGTCTCGGCATTCTGCTGAACCGCTCTTCCGATC*T  |
| iPCRindex26 | CAAGCAGAAGACGGCATAACGAGATTATTCGTCAACGAGATCGGTCTCGGCATTCTGCTGAACCGCTCTTCCGATC*T  |
| iPCRindex27 | CAAGCAGAAGACGGCATAACGAGATGCGCTGATGCAGAGATCGGTCTCGGCATTCTGCTGAACCGCTCTTCCGATC*T  |
| iPCRindex28 | CAAGCAGAAGACGGCATAACGAGATCTCATATGGCTGAGATCGGTCTCGGCATTCTGCTGAACCGCTCTTCCGATC*T  |
| iPCRindex29 | CAAGCAGAAGACGGCATAACGAGATACAGGGGAGGGGAGATCGGTCTCGGCATTCTGCTGAACCGCTCTTCCGATC*T  |
| iPCRindex30 | CAAGCAGAAGACGGCATAACGAGATGGTTTTATACCGAGATCGGTCTCGGCATTCTGCTGAACCGCTCTTCCGATC*T  |
| iPCRindex31 | CAAGCAGAAGACGGCATAACGAGATGCATGACTTTAGAGATCGGTCTCGGCATTCTGCTGAACCGCTCTTCCGATC*T  |
| iPCRindex32 | CAAGCAGAAGACGGCATAACGAGATTTCTGATTCTGAGATCGGTCTCGGCATTCTGCTGAACCGCTCTTCCGATC*T   |

1) © 2006-2008 Illumina, Inc. All rights reserved

Figure S1

a

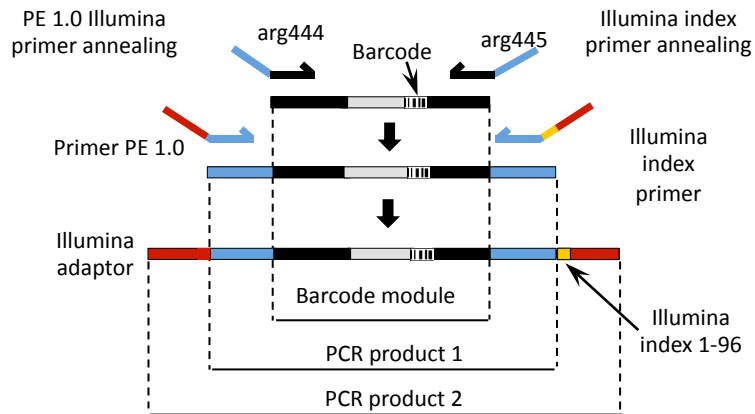

b

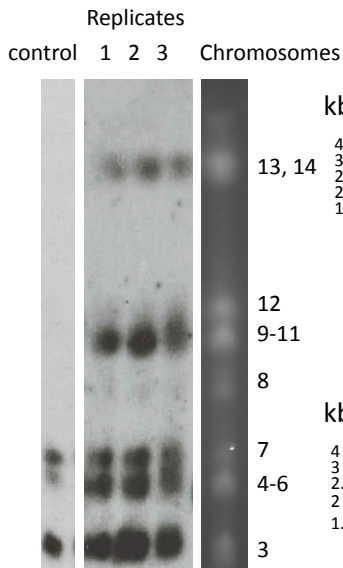

c

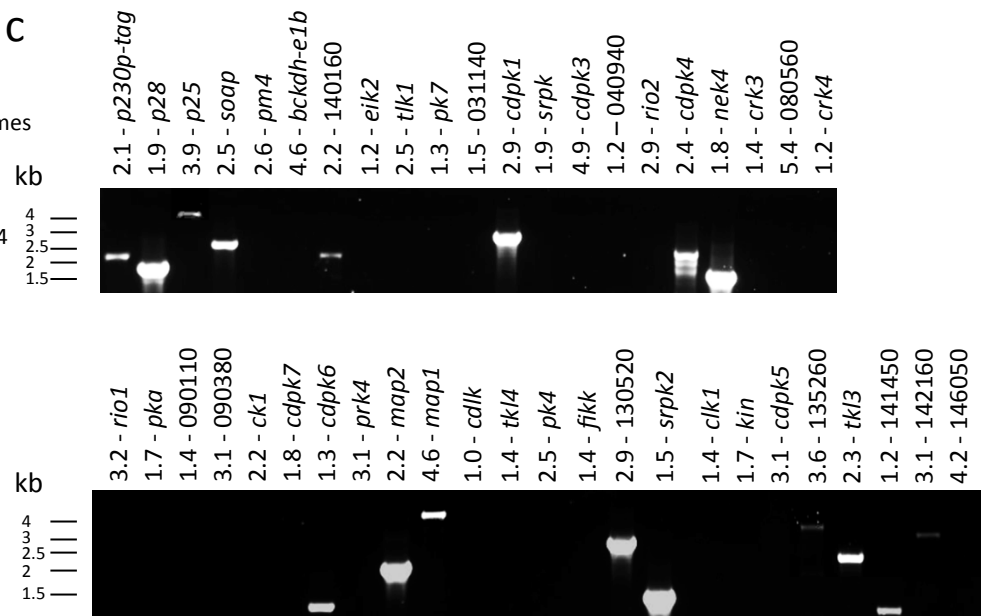

d

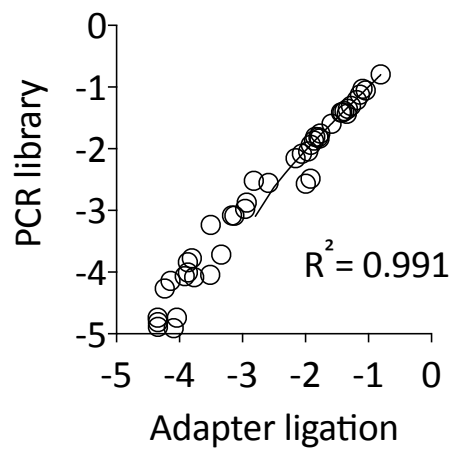

Figure S2

a

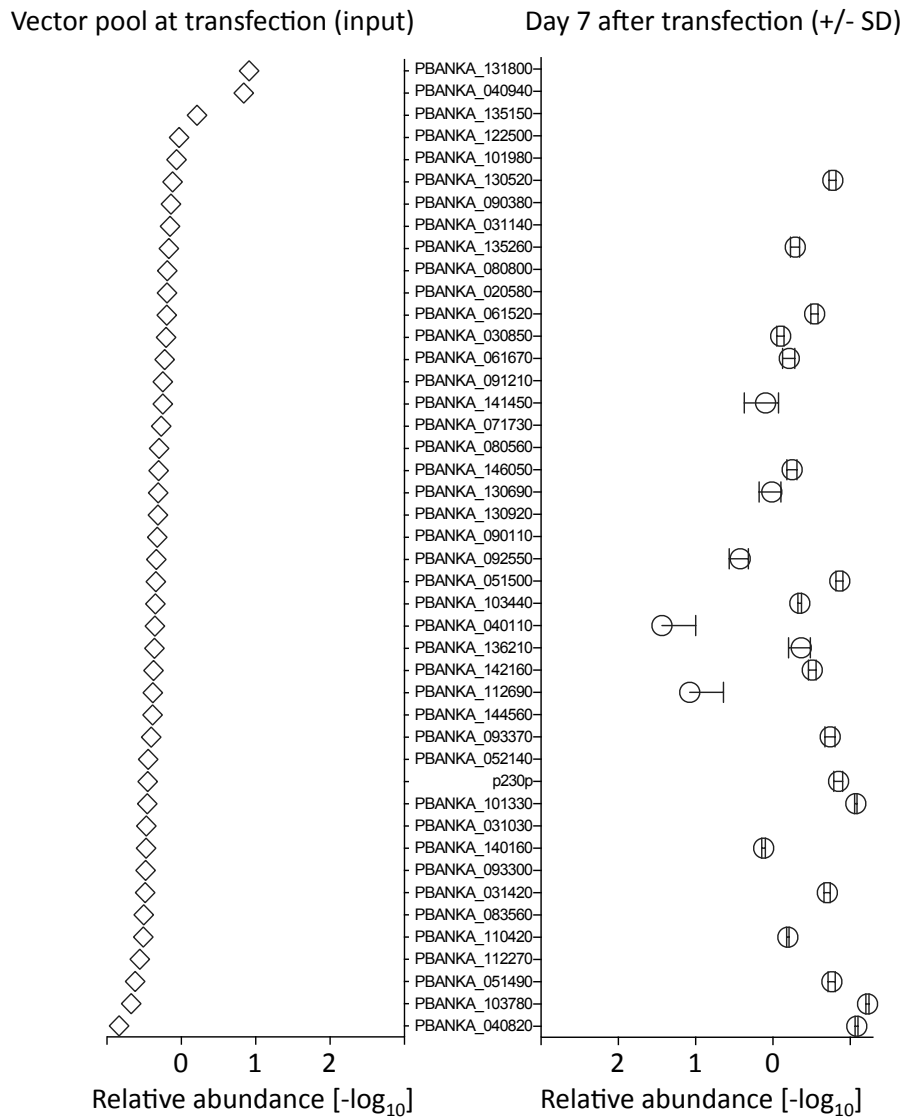

b

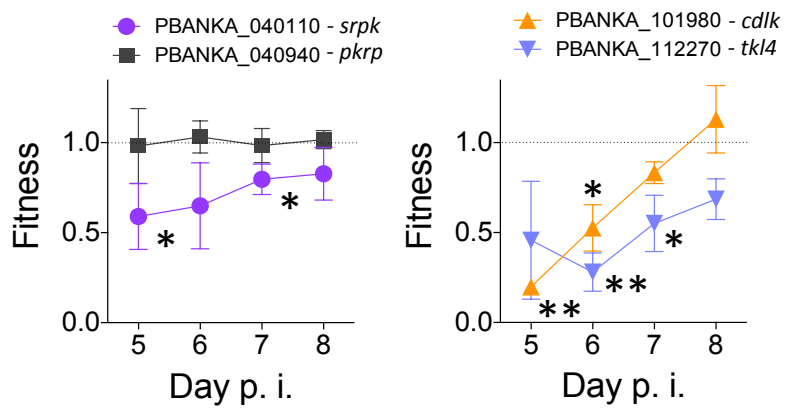

Figure S3

a

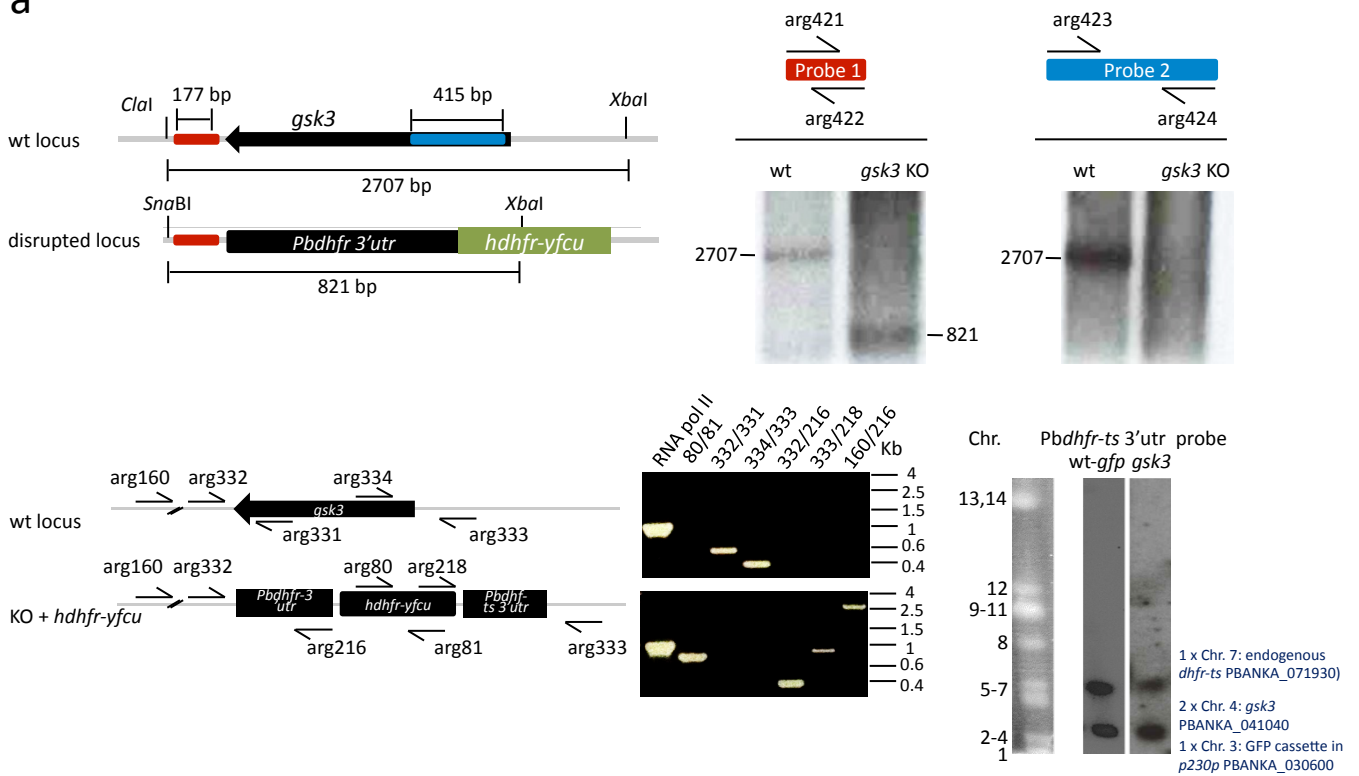

b

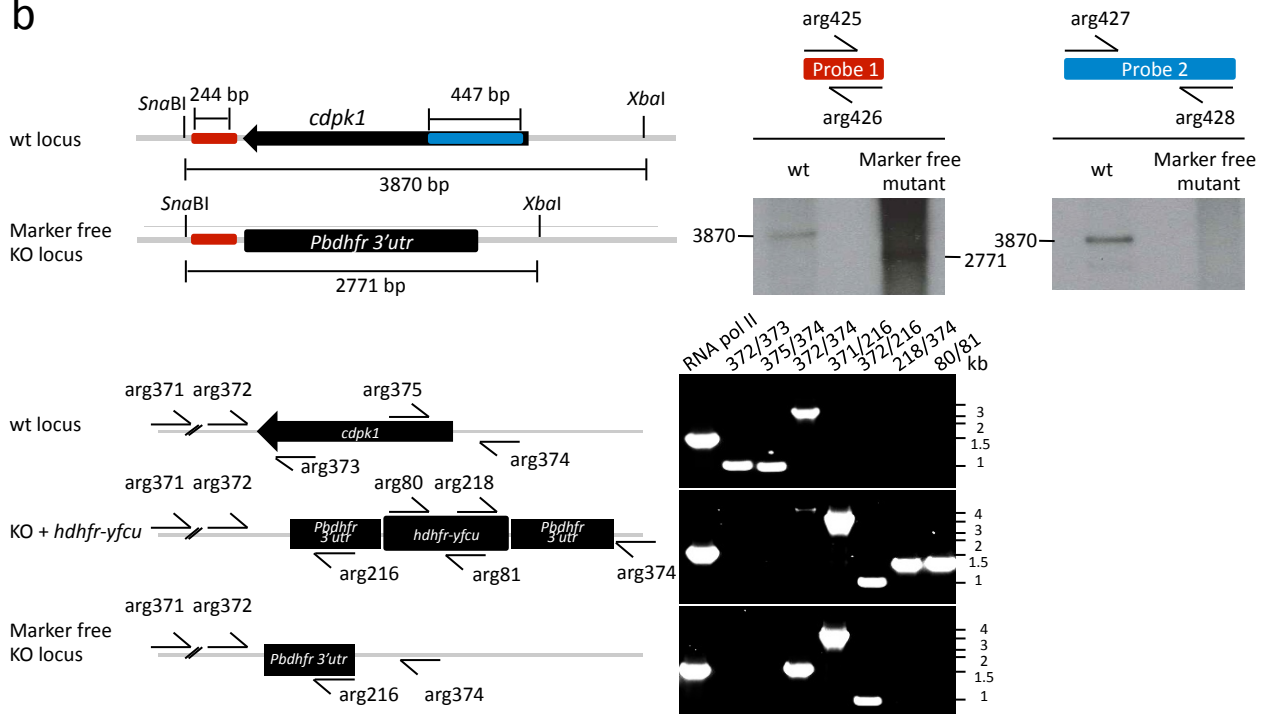

Figure S4

a

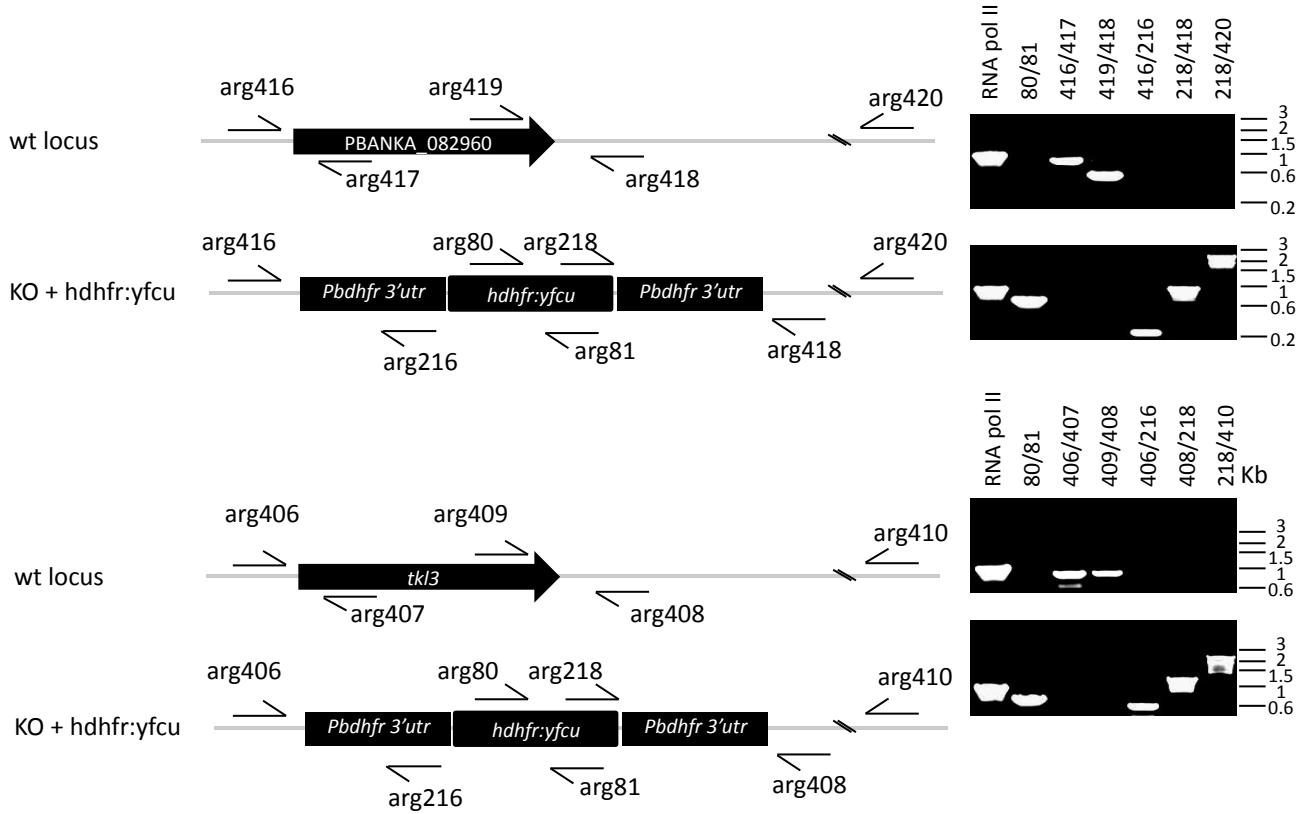

b

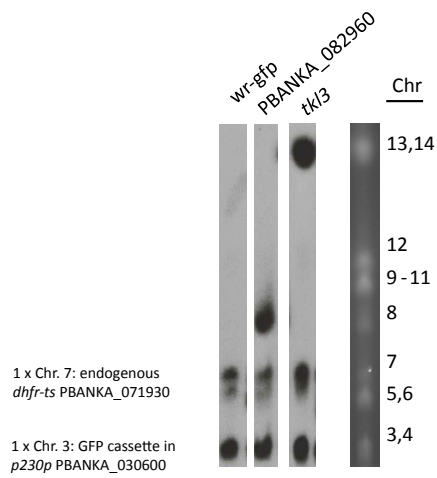



Figure S5

a

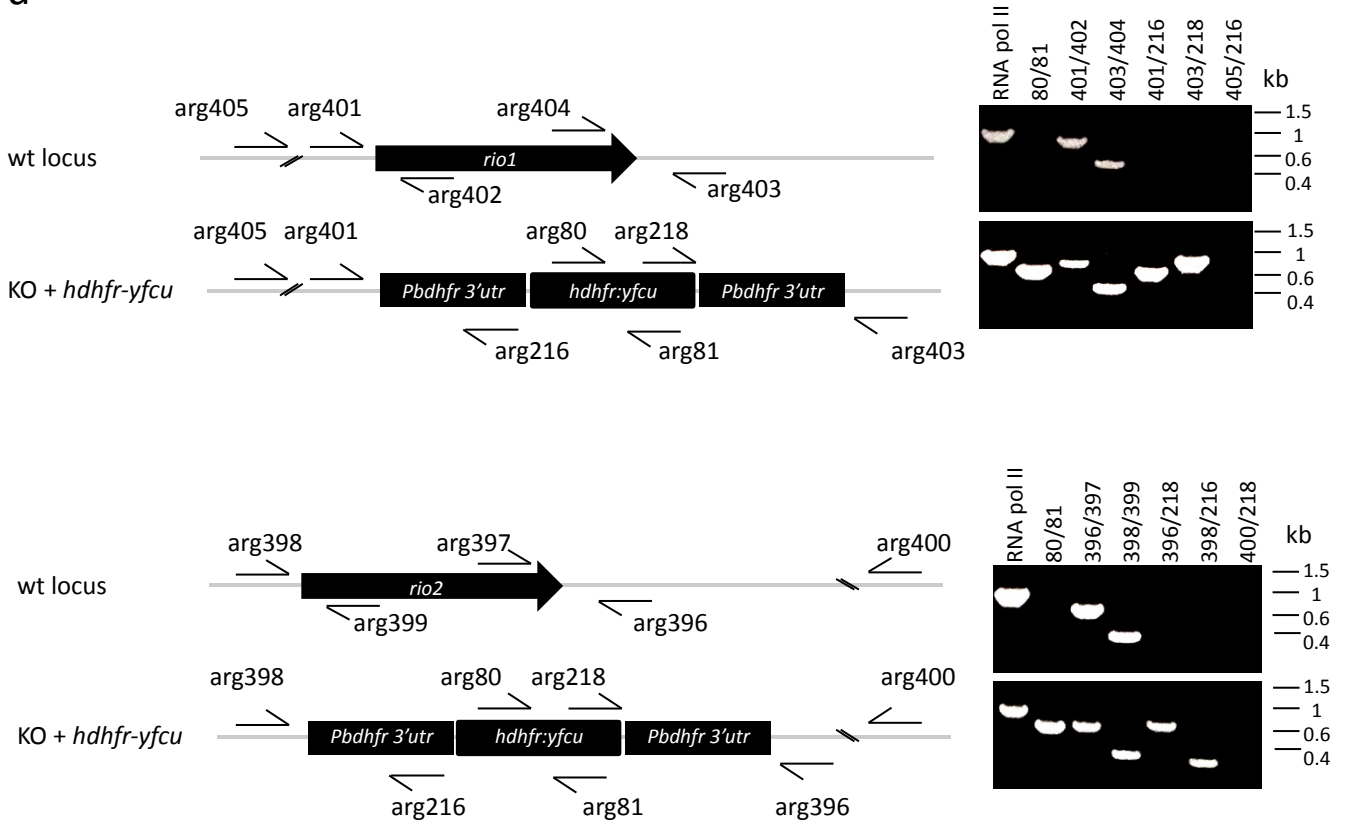

b

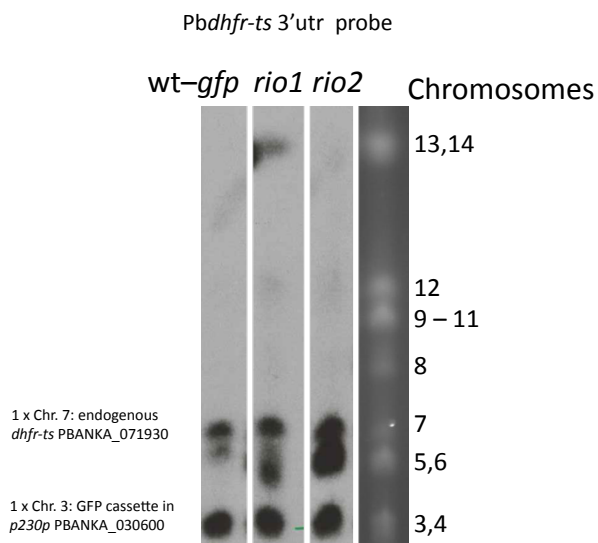

## SUPPLEMENTAL FIGURE TITLES AND LEGENDS

### **Figure S1. Validation of barcode sequencing to phenotype multiple *P. berghei* mutants in the same mouse. Related to Fig. 2 and Fig. 3.**

- a. Schematic of the barcode module illustrating primer annealing sites and amplification steps. See supplemental information for oligonucleotide sequences.
- b. Southern hybridization of chromosomes separated by pulsed-field gel electrophoresis with a ~500 bp probe corresponding to the *dhfr-ts* 3' UTR that is present as two copies in each *Plasmo*GEM vector. Samples were from day 8 post transfection of the experiment shown in Fig. 2b (left panel). In the background strain the probe hybridizes to the *dhfr-ts* locus in chromosome 7, which appears to be polymorphic and to a GFP cassette integrated in the p230p locus of chromosome 3.
- c. Agarose gel electrophoresis of PCR products across the predicted integration sites from the same experiment as **b**, supporting genomic integration for 17 of the 22 vectors whose barcodes are detected in Fig. 2b. Oligonucleotides were designed to amplify from the selection cassette (arg218 or arg216) across the shorter homology arm into the flanking genomic sequence. For each gene the predicted product size is stated in kb before the gene name. Note that the long homology arms of *Plasmo*GEM vectors can give rise to false negative results from PCR genotyping for some genes.
- d. Comparison of sequencing libraries prepared from the same sample either by nested PCR (as shown in panel a), or by conventional adapter ligation. Barcode counts are expressed as  $\log_{10}$  of relative abundance. The dynamic range of the method spans five orders of magnitude, but correlation between methods was highest during the upper two decades. The latter therefore defines the range in which we consider barseq counts reliable. The data shown are representative of six samples analysed in this way.

### **Figure S2. Additional data illustrating the output of barseq screens. Related to Fig. 3.**

- a. Relative abundance of barcodes in the input vector pools of a typical experiment (left bar chart) is compared to barcodes counted after transfecting the same vector pool and applying drug selection for 7 days. Error bars (right chart only) give standard deviations from three transfections with the same vector pool. Read counts were normalized to the total number of relevant barcode counts for a given sample. Raw data for this experiment are shown in the Supplemental Spreadsheet.

- b. Fitness of four protein kinase mutants that were detected only in a second pass barseq experiment from which fast growing mutants except the reference genes had been excluded.** Error bars show standard deviations from four independent transfections. Asterisks indicate significant differences determined by a two sided T-test corrected for multiple testing (  $p < 0.01^{**}$ ;  $p < 0.05^{*}$ ).

**Figure S3. Genotype confirmation for *gsk3* and *cdpk1* knock out clones. Related to Figs. 5 and 6.**

- a.** Southern blot of restricted gDNA, PCR genotyping and hybridization of separated chromosomes showing disruptions of *gsk3*.
- b.** Genotyping by PCR and Southern blot of a *cdpk1* deletion mutant after removal of the resistance cassette under negative selection.

**Figure S4. Genotype confirmation for PBANKA\_082960 and *tkl3* knock out clones. Related to Fig. 5.**

- a.** PCR genotyping strategy and PCR products analysed by agarose gel electrophoresis.
- b.** Southern hybridization of separated chromosomes before cloning showing integration of a targeting vector for PBANKA\_082960 and *tkl3* into the target chromosomes 8 and 13, respectively.

**Figure S5. Additional genotype confirmation of *rio* kinase mutants. Related to Fig. 5.**

- a.** Genotyping by PCR of *rio1* and *rio2* mutants after population enrichment by drug selection and two consecutive cloning attempts..
- b.** Southern hybridization showing integration of the targeting vector for *rio1* and *rio2* into the target chromosomes 14 and 5, respectively.

**Supplemental Protocol 1 – Transfection of *P. berghei* parasites**

Day 1:

Inject a naïve mouse intraperitoneally with  $10^6$  *P. berghei* parasites and monitor parasitaemia on Giemsa stained thin blood smears.

Day 3 (in the evening):

Infect a young (200-250 g) Wistar rat by intraperitoneal injection of mouse blood containing  $10^6$  infected red blood cells diluted to a final volume of 500  $\mu$ L in phosphate buffered saline (PBS).

Usually day 8 (before 12 pm):

1. When parasitaemia has reached 1-3 %, bleed the rat under isofluorane anaesthesia using a 10 mL syringe loaded with 100  $\mu$ L of heparin (300 U mL<sup>-1</sup>) with a 20 G needle.
2. Set up a schizont culture by adding 7 mL of infected blood to 200 mL of schizont culture medium in a sterile 500 mL round bottom culture flask. Gas the culture with malaria gas (5 % CO<sub>2</sub>, 5 % O<sub>2</sub>, and 90 % N<sub>2</sub>) for one minute before closing it tightly. Incubate the culture at 36.5 °C with gentle rotary shaking (just enough to prevent blood from settling).

Schizont culture medium (200 mL): To 144 mL RPMI1640 containing L-glutamine and 25 mM HEPES, without NaHCO<sub>3</sub> (Sigma-Aldrich) add 4 mL of 0.5 M NaHCO<sub>3</sub> (filter sterilized), 2 mL penicillin/streptomycin (10,000 U mL<sup>-1</sup>) and 50 mL fetal calf serum (Gibco).

Day 9:

1. At 10 am check schizont maturation on a Giemsa stained thin blood smear. Once schizonts contain individualized merozoites proceed to purification.
2. In each of four 15 mL Falcon tubes prepare a 55 % Nycodenz/PBS cushions (v/v) by mixing 2.75 mL Nycodenz stock-solution (Janse et al., 2006) with 2.25 mL PBS.
3. Pellet the blood containing the schizonts in 50 mL Falcon tubes for 14 min at 300 g with slow acceleration/deceleration. It is important that the centrifuge is at room temperature at all times.
4. Keep 30 mL of supernatant to wash/dilute purified schizonts later on. Remove the supernatant apart from 3-4 mL at the bottom of the tube which will be used to resuspend the cells.
5. Using a plastic Pasteur pipette, gently layer the cells on top of the Nycodenz cushion prepared in step 3.
6. Centrifuge 20 min at 300 g in a swing out rotor again at room temperature (slow acceleration and break, so as not to disturb the gradient).
7. Collect the brown schizont layer at the interface from all gradients into a 15 mL Falcon tube (1 mL from each gradient) and fill it up to the top with the supernatant kept in step 5.

8. Pellet the schizonts by centrifugation (450 g, 3 min, medium acceleration/ deceleration) and discard supernatant.
9. To use schizonts from one rat for 3 replicate transfections of a barcode sequencing experiment add 54  $\mu\text{L}$  (18  $\mu\text{L}$ /transfection) of P3 Primary Cell 4D-Nucleofector (Lonza) to the pelleted schizonts and resuspend them gently.
10. Mix the schizont suspension with 5  $\mu\text{L}$  of digested DNA and transfer 25  $\mu\text{L}$  of the mix into each of three individual wells of a 16-well Nucleocuvette Strip and pulse using programme FI-115 of the 4D-Nucleofector device.
11. Aspirate schizonts using 1 mL insulin syringe, previously loaded with 100  $\mu\text{L}$  of pre-warmed incomplete RPMI.
12. Inject immediately intra-venously into BALB/c mice.

Day 10:

Early in the morning take thin blood smears to calculate transfection efficiency before starting drug selection with drinking water containing pyrimethamine (0.07 mg/mL).

#### **Supplemental Protocol 2 – Genomic DNA isolation (phenol-chloroform method) for barcode sequencing**

1. Lyse the red blood cells by adding 1 mL of ammonium chloride solution (0.15 M  $\text{NH}_4\text{Cl}$ , 0.01 M  $\text{KHCO}_3$ , 0.001 M EDTA) to the collected blood. Incubate for 2 min on ice.
2. Pellet the parasites (3000 g) and resuspend them in 500  $\mu\text{L}$  of TNE buffer (10 mM Tris pH 8.0, 5 mM EDTA pH 8.0, 100 mM NaCl).  
Add 2  $\mu\text{L}$  of RNase A (20 mg/mL), 55  $\mu\text{L}$  of 10 % SDS and incubate for 10 min at 37  $^\circ\text{C}$ .
3. Add 10  $\mu\text{L}$  of proteinase K (20 mg/mL), vortex and incubate at 37  $^\circ\text{C}$  for 30 min.  
Add 500  $\mu\text{L}$  of buffered phenol:chloroform:isoamylalcohol (25:24:1), invert several times and centrifuge for 5 min at 10,000 g.
4. Transfer the aqueous upper phase into a new tube. Add 500  $\mu\text{L}$  of chloroform:isoamylalcohol (24:1), invert samples several times and centrifuge for 5 min at 10,000 g.
5. Transfer the new aqueous upper phase to a new tube, and precipitate DNA overnight at -20  $^\circ\text{C}$  with 500  $\mu\text{L}$  of isopropanol.

## OLIGONUCLEOTIDE SEQUENCES

| Primer name | Sequence                               | Target/Comment |
|-------------|----------------------------------------|----------------|
| arg00080    | GACTTCTGTAGCCATGATAGC                  | hdhfr::yfcu    |
| arg00081    | CGCCACACTACATGGTGAG                    | hdhfr::yfcu    |
| arg00084    | AAAGAATTCTGATGTTTACAATCACC             | RNApol II      |
| arg00085    | AAAGCGGCCGCTTTCTTCCTGCATCTCCTC         | RNApol II      |
| arg00160    | AGCGAGTCCCGTGCACTCA                    |                |
| arg00331    | TTGAACATTTGCGCATATATTGG                |                |
| arg00332    | GTGCCAAATTATTATGGTATACC                |                |
| arg00333    | TGATCTAGAGATAAAAAGAGGAC                |                |
| arg00334    | CTTCATATTTTACCTGTATGCC                 |                |
| arg00421    | GTGCCAAATTATTATGGTATAC                 |                |
| arg00422    | CCAGAATAATTTTGTAGAATATAG               |                |
| arg00423    | GTACAGTTTGTGGTATATATTCC                |                |
| arg00424    | GGTGATAATAATGCATGCCAAG                 |                |
| arg00371    | CCGGTATTTATCATCCAAGAG                  |                |
| arg00372    | CATTTGTCATGCAATCATTCCG                 |                |
| arg00373    | CCCCTACCTAATTTCCGAAC                   |                |
| arg00374    | GCATCATTGACACGAACTCG                   |                |
| arg00375    | GTGAAGAGAGGCTAAGGAGG                   |                |
| arg00425    | GGTTCTATCTGTTTCATGTAC                  |                |
| arg00426    | CCTCAGAAAATGAATGGCAG                   |                |
| arg00427    | GGTGTAATCAAAGTAAAAGTGC                 |                |
| arg00428    | CTCCACCTTCATAAAATTCGG                  |                |
| arg00396    | GGCATGCCGTATTTTCCATG                   |                |
| arg00397    | ATGCATATCTTTTGTTCAGC                   |                |
| arg00398    | CACCCATCCAAACATATAAAAAG                |                |
| arg00399    | CTAGTAATAGTCAGTCTGGGG                  |                |
| arg00400    | TCCAAAGCGTTATGCCAAGTGT                 |                |
| arg00401    | GCAACTCGTTATATATTTCCG                  |                |
| arg00402    | CTTTTCCAGAACTAACTACTCC                 |                |
| arg00403    | CTTTTCTTGTAACACCCTCAG                  |                |
| arg00404    | TGGAACTACAAAATAGATTTCCG                |                |
| arg00405    | GCTCAAGCAACAGCAGGAC                    |                |
| arg00496    | CGTTTTTCTTACTTATATATTTTATACCAATTGATTGT | PFGE probe     |
| arg00497    | TCGAAATTGAAGGAAAAAACATCATTTG           | PFGE probe     |
| arg00216    | CGGGGCCCTTATGCATAATC                   |                |
| arg00218    | CTTTGGTGACAGATACTACTG                  |                |
| arg00406    | ATCCAAATATGGTATTTTGAGC                 |                |
| arg00407    | CTGGAGATTCGTTTTGTTTAC                  |                |
| arg00408    | TTGTGTTTGCCGCATGTTGC                   |                |
| arg00409    | GATATTCCTAAAGATCTATCTG                 |                |
| arg00410    | ACGACAATGTGCATGCCTCA                   |                |
| arg00416    | CGTACTTGAATAGCTGTCTAC                  |                |
| arg00417    | CCCCAATATAATGAATATTCTG                 |                |
| arg00418    | GAGCATTCCGCAAAGTATGTC                  |                |
| arg00419    | GGGAACACATCCTTTTAGTTC                  |                |
| arg00420    | AGCCATTACCCGTTGTTTCG                   |                |
| arg00215    | TCATTCTTCGAAAACGATCT                   | zeocin         |
| arg00083    | CCGCCTACTGCGACTATAGA                   | zeocin         |
| arg00218    | CTTTGGTGACAGATACTACTG                  |                |
| arg00057    | GAAACACAATGTTGAAATTC                   | <i>map2</i>    |
| arg00102    | GTGTAGAAGTAAATTCATACCC                 | <i>srpk2</i>   |
| arg00370    | GGTTATGAGAAGTTAAACTACG                 | <i>cdpk4</i>   |

## **SUPPLEMENTAL REFERENCE**

Janse, C.J., Ramesar, J., and Waters, A.P. (2006). High-efficiency transfection and drug selection of genetically transformed blood stages of the rodent malaria parasite *Plasmodium berghei*. *Nature protocols* *1*, 346-356.
